# Supplementary material for: Peroxisomal Fitness: A Potential Protective Mechanism of Fenofibrate against High Fat Diet-Induced Non-Alcoholic Fatty Liver Disease in Mice
Source: PubMed Central journal article supplement — Diabetes Metab J. 2022 Jun 24;46(6):829–42. doi: 10.4093/dmj.2021.0274 (PMC9723204; doi:10.4093/dmj.2021.0274), 2022-06-24
Supplement: dmj-2021-0274-suppl1.pdf [file dmj-2021-0274-suppl1.pdf]

**Supplementary Table 1.** Primer sequences used for RT-qPCR analysis

| Gene (mouse) | Forward primer (5'-3')        | Reverse primer (5'-3')      |
|--------------|-------------------------------|-----------------------------|
| 18s          | CGA AAG CAT TTG CCA AGA AT    | AGT CGG CAT CGT TTA TGG TC  |
| F4/80        | CTG TAA CCG GAT GGC AAA CT    | ATG GCC AAG GCA AGA CAT AC  |
| Il1b         | ACA GAT GAA GTG CTC CTT CCA   | GTC GGA GAT TCG TAG CTG GAT |
| Il6          | AGT TGC CTT CTT GGG ACT GA    | TCC ACG ATT TCC CAG AGA AC  |
| Mcp1         | CTT CTG GGC CTG CTG TTC A     | CCA GCC TAC TCA TTG GGA TCA |
| Pex3         | TTC CCA TAG TGA ACG GGC AG    | TGA CAC GTG GTT CAG TCA CTT |
| Pex5         | AAA TTC GTG CGG CAG ATT GG    | TGC TGC CCA CTG TTC TGC CT  |
| Pex7         | GGA GCC AAA CCA GAG GTG AA    | TGA CAC TCT CAT GGC CCC TA  |
| Pex11        | CAC TGG CCG TAA ATG GTT CA    | GCT TGG ATG CTC TGC TCA GTT |
| Pex13        | CCA TGT AGT TGC CAG AGC AG    | CAT CAA GGC TAG CCA GAA GC  |
| Pex14        | CTC CAC GAC TGG GCG GAA GC    | GCA GGG GCG TTG AGT GCA GA  |
| Pex16        | GCA GGA GAC CAT TGC AGA GT    | CAC ACC AGA CAG TAG CCA GG  |
| Pex19        | TGT GCT GTA CCC ATC CCT GA    | TGC TGC TGC TGG TAC TTC TC  |
| Abcd1        | AGT GCC ATC CGC TAC CTA GA    | CGA GGT TTC GAA GTC GTC CA  |
| Abcd2        | AAA TTT GGT TCG CTG GTG GC    | CCA CAG CTG CTC CAC ACA TA  |
| Abcd3        | GGG ACA GTG TTC AGG ACT GGA T | CAG TCT TGC CAT CGC CAT T   |
| catalase     | CAC ACC TAC ACG CAG GCC GG    | CTG CGC TCC GGA GTG GGA GA  |
| Acox1        | AGA TTG GTA GAA ATT GCT GA    | ACG CCA CTT CCT TGC TCT TC  |

RT-qPCR, real time-polymerase chain reaction; Abcd, ATP binding cassette subfamily D member; Acox1, acyl-CoA oxidase 1; Il, interleukin; Mcp1, monocyte chemoattractant protein 1; Pex, peroxisomal biogenesis factor.
