# Supplementary material for: Peroxisomal Fitness: A Potential Protective Mechanism of Fenofibrate against High Fat Diet-Induced Non-Alcoholic Fatty Liver Disease in Mice
Source: PubMed Central journal article supplement — Diabetes Metab J. 2022 Jun 24;46(6):829–42. doi: 10.4093/dmj.2021.0274 (PMC9723204; doi:10.4093/dmj.2021.0274), 2022-06-24
Supplement: dmj-2021-0274-suppl2.pdf [file dmj-2021-0274-suppl2.pdf]

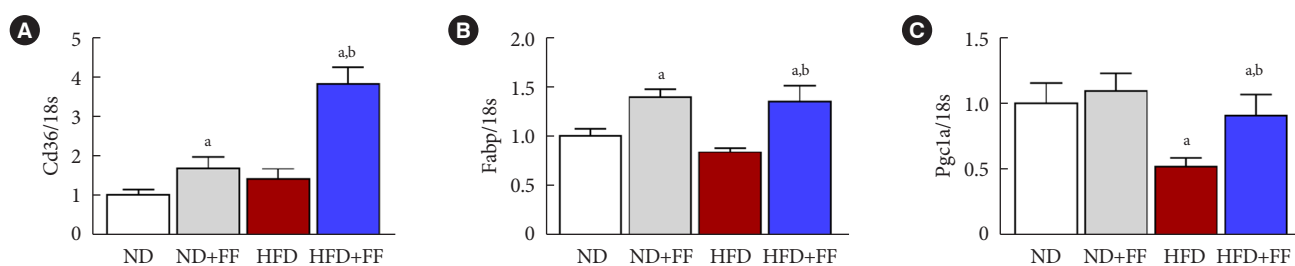

**Supplementary Fig. 1.** The expression of peroxisome proliferator-activated receptor  $\alpha$  (PPAR $\alpha$ ) target genes in wild-type (WT) mice. (A) Cluster of differentiation 36 (Cd36), (B) fatty-acid-binding protein (Fabp), and (C) peroxisome proliferator-activated receptor co-activator-1 $\alpha$  (Pgc1a) were measured by real-time polymerase chain reaction, and the results were normalized to the 18S rRNA levels. Data are expressed as the mean  $\pm$  standard error of 6 mice/group. FF, fenofibrate; HFD, high-fat diet; ND, normal diet. <sup>a</sup> $P < 0.05$  vs. ND, <sup>b</sup> $P < 0.05$  vs. HFD.
