# Supplementary material for: Peroxisomal Fitness: A Potential Protective Mechanism of Fenofibrate against High Fat Diet-Induced Non-Alcoholic Fatty Liver Disease in Mice
Source: PubMed Central journal article supplement — Diabetes Metab J. 2022 Jun 24;46(6):829–42. doi: 10.4093/dmj.2021.0274 (PMC9723204; doi:10.4093/dmj.2021.0274), 2022-06-24
Supplement: dmj-2021-0274-suppl4.pdf [file dmj-2021-0274-suppl4.pdf]

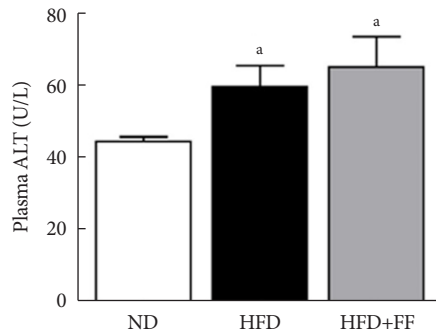

**Supplementary Fig. 3.** Plasma alanine aminotransferase (ALT) levels in *Ppara*<sup>-/-</sup> mice. Plasma ALT levels were measured using an enzyme-linked immunosorbent assay (ELISA) kit. Data are expressed as the mean  $\pm$  standard error of 6 mice/group. ND, normal diet; HFD, high-fat diet; FF, fenofibrate. <sup>a</sup> $P < 0.05$  vs. ND.
