# Supplementary material for: Peroxisomal Fitness: A Potential Protective Mechanism of Fenofibrate against High Fat Diet-Induced Non-Alcoholic Fatty Liver Disease in Mice
Source: PubMed Central journal article supplement — Diabetes Metab J. 2022 Jun 24;46(6):829–42. doi: 10.4093/dmj.2021.0274 (PMC9723204; doi:10.4093/dmj.2021.0274), 2022-06-24
Supplement: dmj-2021-0274-suppl5.pdf [file dmj-2021-0274-suppl5.pdf]

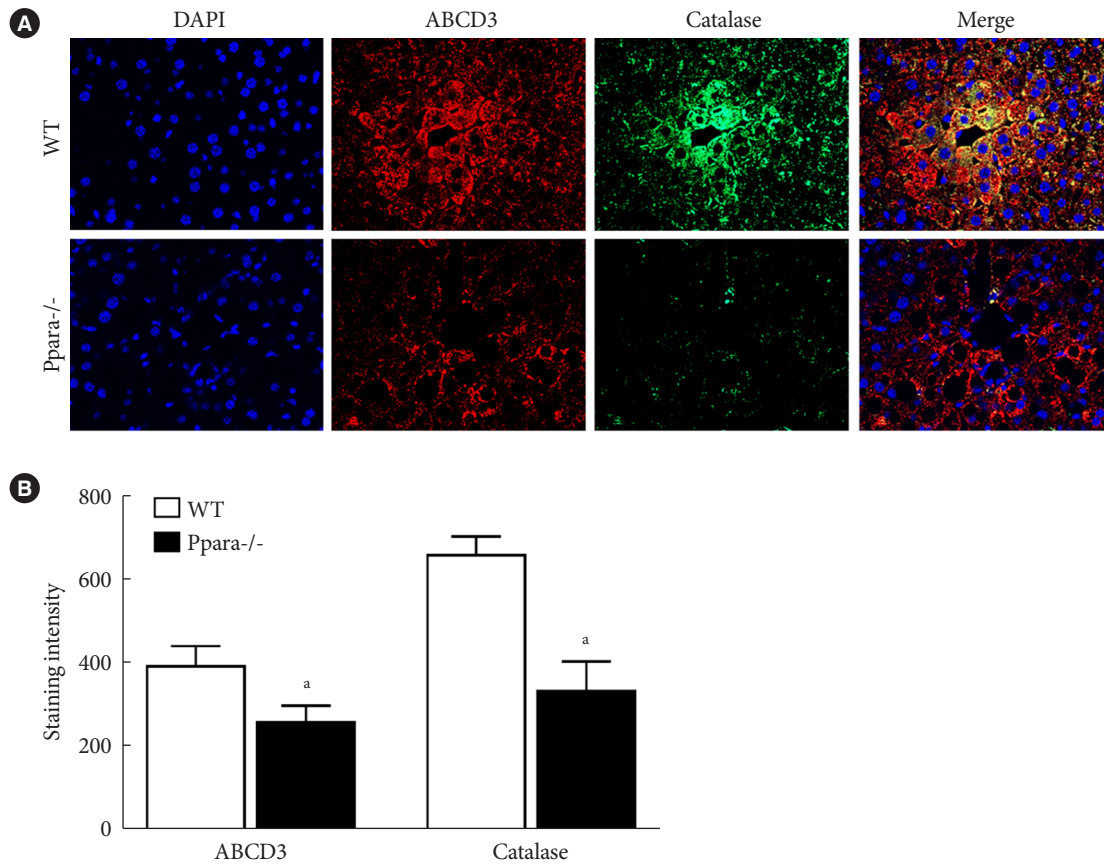

**Supplementary Fig. 4.** Peroxisome biogenesis and activity in wild-type (WT) and *Ppara*<sup>-/-</sup> mice. (A, B) ATP binding cassette sub-family D member 3 (ABCD3) and catalase levels were decreased in *Ppara*<sup>-/-</sup> mice. DAPI, 4',6-diamidino-2-phenylindole dihydrochloride. <sup>a</sup>*P*<0.05 vs. WT.
